# Supplementary material for: Revisiting the quasi-aromaticity in polynuclear metal chalcogenide clusters and their derivative “cluster-assembly” crystalline structures
Source: Royal Society of Chemistry journal article supplement (doi:10.1039/d4cp01022a), 2024-01-01
Supplement: d4cp01022a1.pdf [file d4cp01022a1.pdf]

## Supporting Information

### **Revisiting the quasi-aromaticity in polynuclear metal chalcogenide clusters and its derivative “cluster-assembly” crystalline structures**

Bochu Wang<sup>1,2</sup> and Wan-Lu Li<sup>\*1,3</sup>

<sup>1</sup>Department of NanoEngineering, University of California San Diego, CA 92093

<sup>2</sup>Department of Chemistry, University of California San Diego, CA 92093

<sup>3</sup>Program of Materials Science and Engineering, University of California San Diego, CA 92093

\*Corresponding Author: [wal019@ucsd.edu](mailto:wal019@ucsd.edu)

**Table S1.** Optimized bond parameters of  $[M_3X_4(H_2O)_9]^{4+}$  clusters ( $M = Cr, Mo, W, Sg$ ;  $X = O, S, Se, Te$ ) at SR-ZORA PBE/VTZ level, and the single ( $r_1$ ) and double ( $r_2$ ) M–M bonds based on the latest recommended covalent radii by Pyykkö, which are all in Å.

|                           | M–M   | X <sup>b</sup> –X <sup>b</sup> | M–X <sup>c</sup> | M–X <sup>b</sup> | $r_1(M-X)$ | $r_2(M-X)$ | M–H <sub>2</sub> O         |
|---------------------------|-------|--------------------------------|------------------|------------------|------------|------------|----------------------------|
| $[Cr_3O_4(H_2O)_9]^{4+}$  | 2.394 | 2.640                          | 1.901            | 1.775            | 1.85       | 1.68       | 2.106 (2.090) <sup>a</sup> |
| $[Mo_3O_4(H_2O)_9]^{4+}$  | 2.552 | 2.834                          | 2.068            | 1.919            | 2.01       | 1.78       | 2.237 (2.221)              |
| $[W_3O_4(H_2O)_9]^{4+}$   | 2.543 | 2.845                          | 2.081            | 1.925            | 2.00       | 1.77       | 2.226 (2.207)              |
| $[Sg_3O_4(H_2O)_9]^{4+}$  | 2.648 | 2.939                          | 2.176            | 1.999            | 2.06       | 1.85       | 2.302 (2.271)              |
| $[Cr_3S_4(H_2O)_9]^{4+}$  | 2.708 | 3.178                          | 2.233            | 2.164            | 2.25       | 2.05       | 2.171 (2.151)              |
| $[Mo_3S_4(H_2O)_9]^{4+}$  | 2.791 | 3.404                          | 2.374            | 2.294            | 2.41       | 2.15       | 2.291 (2.279)              |
| $[W_3S_4(H_2O)_9]^{4+}$   | 2.766 | 3.465                          | 2.394            | 2.314            | 2.40       | 2.14       | 2.273 (2.262)              |
| $[Sg_3S_4(H_2O)_9]^{4+}$  | 2.884 | 3.606                          | 2.509            | 2.409            | 2.46       | 2.22       | 2.339 (2.325)              |
| $[Cr_3Se_4(H_2O)_9]^{4+}$ | 2.830 | 3.349                          | 2.370            | 2.304            | 2.38       | 2.18       | 2.183 (2.168)              |
| $[Mo_3Se_4(H_2O)_9]^{4+}$ | 2.850 | 3.597                          | 2.497            | 2.424            | 2.54       | 2.28       | 2.308 (2.295)              |
| $[W_3Se_4(H_2O)_9]^{4+}$  | 2.792 | 3.640                          | 2.511            | 2.434            | 2.53       | 2.27       | 2.288 (2.280)              |
| $[Sg_3Se_4(H_2O)_9]^{4+}$ | 2.858 | 3.761                          | 2.595            | 2.505            | 2.59       | 2.35       | 2.354 (2.347)              |
| $[Cr_3Te_4(H_2O)_9]^{4+}$ | 3.000 | 3.683                          | 2.581            | 2.520            | 2.58       | 2.39       | 2.192 (2.172)              |
| $[Mo_3Te_4(H_2O)_9]^{4+}$ | 2.938 | 3.905                          | 2.699            | 2.633            | 2.74       | 2.49       | 2.332 (2.323)              |
| +                         |       |                                |                  |                  |            |            |                            |
| $[W_3Te_4(H_2O)_9]^{4+}$  | 2.842 | 3.961                          | 2.720            | 2.646            | 2.73       | 2.48       | 2.315 (2.313)              |
| $[Sg_3Te_4(H_2O)_9]^{4+}$ | 2.888 | 4.087                          | 2.805            | 2.716            | 2.79       | 2.56       | 2.385 (2.380)              |

<sup>a</sup> Results without parentheses are corresponding to the distances between M and the H<sub>2</sub>O moiety near X<sup>c</sup>; results in the parentheses are the distances between M and the H<sub>2</sub>O near X<sup>b</sup> atoms.

**Table S2.** Orbital types transformed irreducible representations and the corresponding bonding types of d-based AOs in  $M_3$  cluster with  $C_{3v}$  symmetry.

| Orbital type         | Irreducible representation | Bonding type |
|----------------------|----------------------------|--------------|
| $\Gamma d_z^2$       | $a_1$                      | $\sigma_r$   |
|                      | $e$                        | $\sigma_r^*$ |
| $\Gamma d_{xz}$      | $e$                        | $\sigma_t$   |
|                      | $a_2$                      | $\sigma_t^*$ |
| $\Gamma d_{yz}$      | $a_1$                      | $\pi_r$      |
|                      | $e$                        | $\pi_r^*$    |
| $\Gamma d_{xy}$      | $e$                        | $\pi_t$      |
|                      | $a_2$                      | $\pi_t^*$    |
| $\Gamma d_{x^2-y^2}$ | $a_1$                      | $\delta_v$   |
|                      | $e$                        | $\delta_v^*$ |

**Table S3.** M–M, X<sup>b</sup>–X<sup>b</sup> and M–X<sup>b</sup> bond orders indices of [M<sub>3</sub>X<sub>4</sub>(H<sub>2</sub>O)<sub>9</sub>]<sup>4+</sup> clusters (M = Cr, Mo, W, Sg; X = O, S, Se, Te) at PBE/VTZ level.

| BO     |                                | X = O |      |      |      | X = S |      |      |      | X = Se |      |      |      | X = Te |      |      |      |
|--------|--------------------------------|-------|------|------|------|-------|------|------|------|--------|------|------|------|--------|------|------|------|
|        |                                | Cr    | Mo   | W    | Sg   | Cr    | Mo   | W    | Sg   | Cr     | Mo   | W    | Sg   | Cr     | Mo   | W    | Sg   |
| Mayer  | M–M                            | 0.73  | 0.74 | 0.92 | 1.11 | 0.76  | 0.77 | 0.90 | 0.94 | 0.70   | 0.71 | 0.79 | 0.87 | 0.82   | 0.85 | 0.86 | 1.02 |
|        | X <sup>b</sup> –X <sup>b</sup> | 0.02  | 0.04 | 0.03 | 0.03 | 0.04  | 0.03 | 0.03 | 0.04 | 0.04   | 0.01 | 0.02 | 0.04 | 0.05   | 0.03 | 0.04 | 0.05 |
|        | M–X <sup>b</sup>               | 1.02  | 0.91 | 0.90 | 0.89 | 1.31  | 1.24 | 1.23 | 1.20 | 1.31   | 1.22 | 1.22 | 1.22 | 1.50   | 1.46 | 1.45 | 1.43 |
| G-J    | M–M                            | 0.69  | 0.76 | 0.81 | 0.85 | 0.64  | 0.67 | 0.74 | 0.79 | 0.65   | 0.68 | 0.75 | 0.80 | 0.66   | 0.69 | 0.77 | 0.84 |
|        | X <sup>b</sup> –X <sup>b</sup> | 0.04  | 0.05 | 0.05 | 0.04 | 0.06  | 0.06 | 0.05 | 0.05 | 0.07   | 0.06 | 0.06 | 0.06 | 0.09   | 0.07 | 0.06 | 0.06 |
|        | M–X <sup>b</sup>               | 1.04  | 1.00 | 0.97 | 0.95 | 1.17  | 1.15 | 1.13 | 1.11 | 1.17   | 1.16 | 1.13 | 1.11 | 1.19   | 1.17 | 1.16 | 1.13 |
| N-M(1) | M–M                            | 0.79  | 0.86 | 0.97 | 1.00 | 0.71  | 0.74 | 0.85 | 0.89 | 0.72   | 0.75 | 0.86 | 0.90 | 0.73   | 0.75 | 0.87 | 0.92 |
|        | X <sup>b</sup> –X <sup>b</sup> | 0.05  | 0.06 | 0.05 | 0.05 | 0.05  | 0.06 | 0.06 | 0.06 | 0.07   | 0.06 | 0.06 | 0.06 | 0.09   | 0.07 | 0.06 | 0.07 |
|        | M–X <sup>b</sup>               | 1.15  | 1.12 | 1.14 | 1.12 | 1.24  | 1.24 | 1.23 | 1.21 | 1.24   | 1.23 | 1.21 | 1.20 | 1.25   | 1.24 | 1.22 | 1.20 |
| N-M(3) | M–M                            | 0.64  | 0.69 | 0.77 | 0.79 | 0.63  | 0.66 | 0.75 | 0.77 | 0.65   | 0.67 | 0.76 | 0.79 | 0.67   | 0.70 | 0.80 | 0.83 |
|        | X <sup>b</sup> –X <sup>b</sup> | 0.05  | 0.06 | 0.06 | 0.06 | 0.06  | 0.06 | 0.06 | 0.06 | 0.07   | 0.06 | 0.06 | 0.06 | 0.08   | 0.06 | 0.06 | 0.06 |
|        | M–X <sup>b</sup>               | 1.12  | 1.11 | 1.10 | 1.09 | 1.17  | 1.15 | 1.15 | 1.14 | 1.16   | 1.15 | 1.14 | 1.13 | 1.15   | 1.14 | 1.12 | 1.11 |

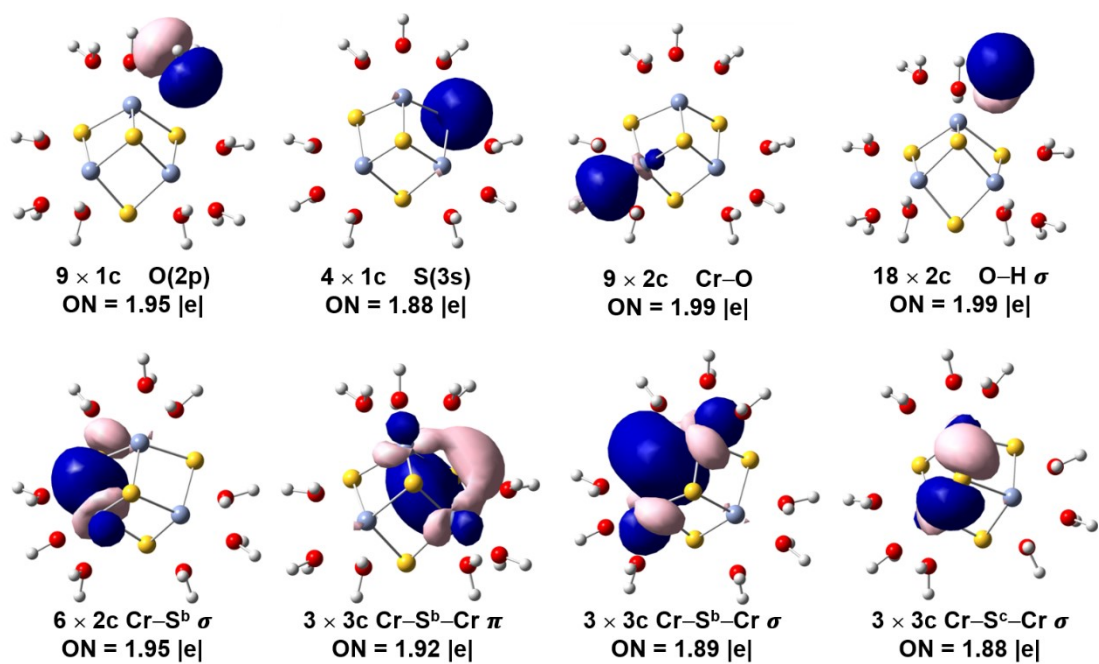

**Figure S1.** AdNDP localized orbitals of  $[\text{Cr}_3\text{S}_4(\text{H}_2\text{O})_9]^{4+}$  at the PBE/VTZ level. ON means the occupation number (isosurface value = 0.02 au).

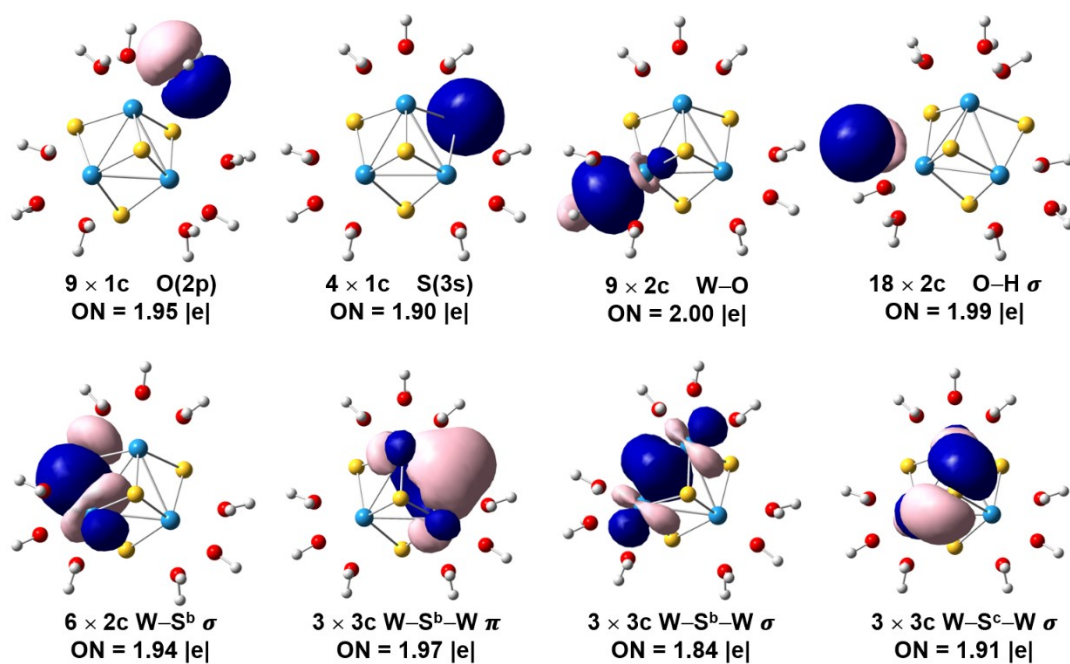

**Figure S2.** AdNDP localized orbitals of  $[\text{W}_3\text{S}_4(\text{H}_2\text{O})_9]^{4+}$  at the PBE/VTZ level. ON means the occupation number (isosurface value = 0.02 au).

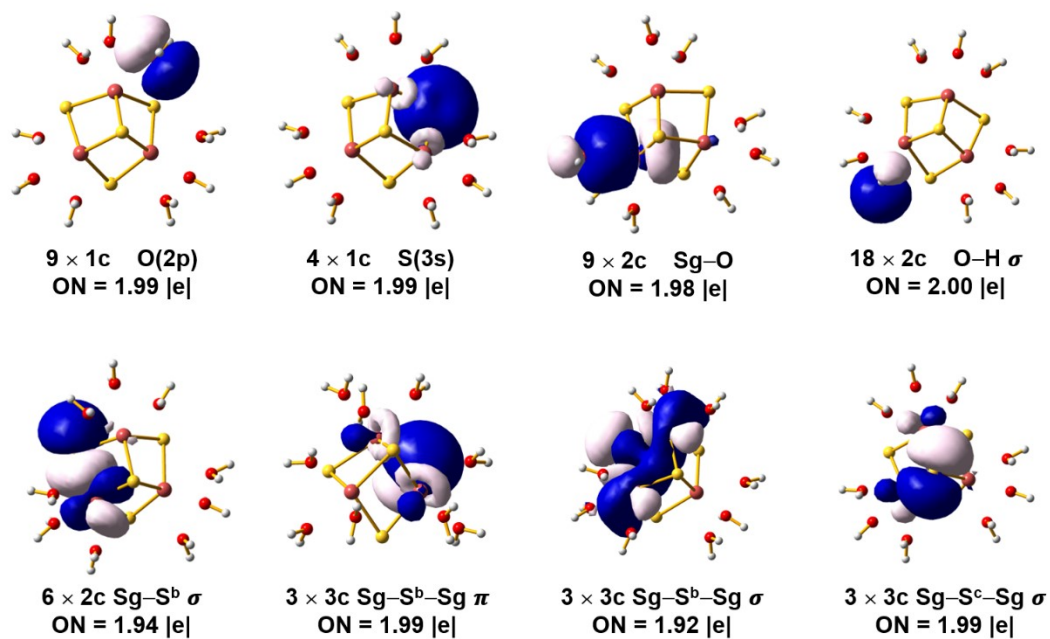

**Figure S3.** AdNDP localized orbitals of  $[\text{Sg}_3\text{S}_4(\text{H}_2\text{O})_9]^{4+}$  at the PBE/VTZ level. ON means the occupation number (isosurface value = 0.02 au).

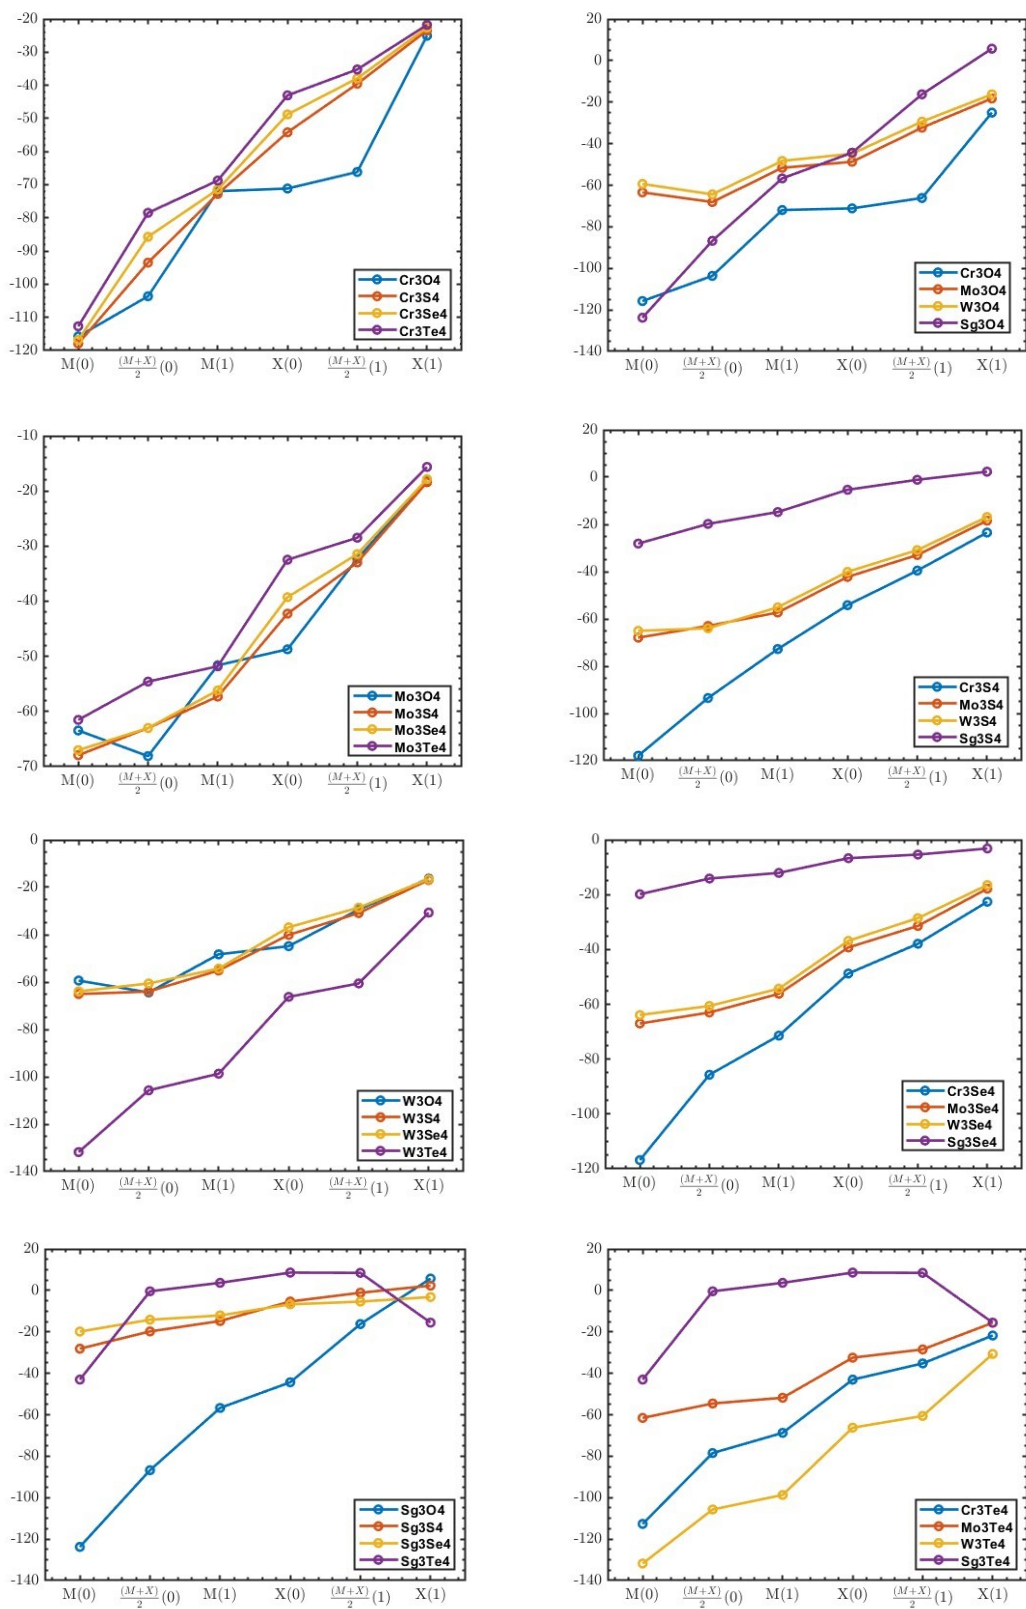

**Figure S4.** The NICS values of all 16  $[M_3X_4]^{4+}$  clusters (a:  $M = \text{Cr, Mo, W, Sg}$ ; b:  $X = \text{O, S, Se, Te}$ ) at PBE/VTZ level. The NICS values of  $\text{Sg}_3\text{Te}_4$  were calculated at B3LYP level.



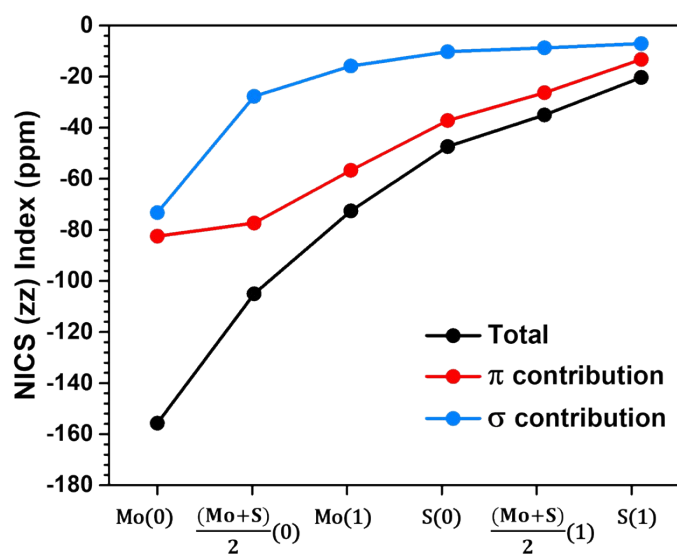

**Figure S5.** The  $NICS_{zz}$  values of  $[Mo_3S_4]^{4+}$  at B3LYP/VTZ level, as well as the contributions from the  $\sigma$  and  $\pi$  components. Six special points are considered: centers

of  $Mo_3$  plane Mo (0),  $S_3$  plane S (0), half between  $Mo_3$  and  $S_3$  plane  $\frac{(Mo + S)}{2}$  (0), and

1 Å above each plane: Mo (1), S (1) and  $\frac{(Mo + S)}{2}$  (1).

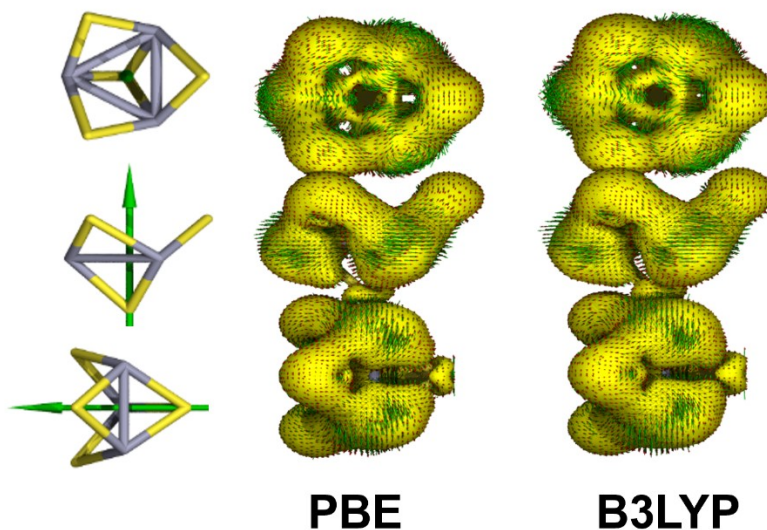

**Figure S6.** The MICD current diagrams of  $Mo_3S_4^{4+}$  from three different views at the levels of PBE and B3LYP functionals with VTZ basis sets. The red and green color in the contour plot correspond to the arrowhead and tail, respectively.

**Table S4.** Energy integral (–ICOHP, in eV/bond) values and electronic states in BaMo<sub>6</sub>S<sub>8</sub>, and atomic charges in *e* as obtained from Mulliken (M) and Löwdin (L) population approaches.

| –ICOHP |       | Electronic configuration and valence charge             |                                            |                                            |                                            |                                            |                                            |
|--------|-------|---------------------------------------------------------|--------------------------------------------|--------------------------------------------|--------------------------------------------|--------------------------------------------|--------------------------------------------|
| Mo–S   | Mo–Mo | Mo                                                      |                                            | S                                          |                                            | Ba                                         |                                            |
|        |       | M (4d <sup>5.14</sup> 5s <sup>0.52</sup> ) <sup>a</sup> | L (4d <sup>5.23</sup> 5s <sup>0.51</sup> ) | M (3s <sup>1.78</sup> 3p <sup>4.67</sup> ) | L (3s <sup>1.64</sup> 3p <sup>4.63</sup> ) | M (6s <sup>0.26</sup> 3p <sup>0.30</sup> ) | L (6s <sup>0.44</sup> 3p <sup>1.11</sup> ) |
| -2.53  | -1.65 | 0.34 (0.24) <sup>b</sup>                                | 0.26                                       | -0.45 (-0.43)                              | -0.27                                      | 1.49                                       | 0.55                                       |

<sup>a</sup> Values in the parentheses in this row correspond to the electronic structures from Mulliken (M) and Löwdin (L) methods.

<sup>b</sup> Values in the parentheses in this row correspond to the Mulliken charge on Mo and S atoms in Mo<sub>6</sub>S<sub>8</sub><sup>2-</sup> cluster for comparison.

**Table S5.** Bader atomic charges in *e* of Mo<sub>3</sub>S<sub>6</sub> cluster for comparison with MoS<sub>2</sub> nanomaterial.

|                                        | Mo   | S     |
|----------------------------------------|------|-------|
| Mo <sub>3</sub> S <sub>6</sub> cluster | 0.99 | -0.50 |
| MoS <sub>2</sub> nanomaterial          | 0.88 | -0.44 |

**Table S6.** Geometric parameter (length in Å and angle in °) comparison of theoretical Mo<sub>3</sub>S<sub>4</sub> nanomaterials and Mo<sub>6</sub>S<sub>8</sub> cluster at GGA/PBE level.

|                                              | <i>a</i> | <i>b</i> | <i>c</i> | <i>α</i> | <i>β</i> | <i>γ</i> | Mo–S <sup>a</sup> | Mo–Mo <sup>a</sup> |
|----------------------------------------------|----------|----------|----------|----------|----------|----------|-------------------|--------------------|
| Theo. BaMo <sub>6</sub> S <sub>8</sub>       | 9.29     | 9.29     | 9.29     | 90.00    | 90.00    | 120.0    | 2.4388            | 2.8363             |
| Mo <sub>6</sub> S <sub>8</sub> <sup>2-</sup> | -        | -        | -        | -        | -        | -        | 2.4364            | 2.6277             |

<sup>a</sup> The bond lengths of Mo–S and Mo–Mo are the average values in both Mo<sub>3</sub>S<sub>4</sub> nanomaterials and Mo<sub>6</sub>S<sub>8</sub> cluster.

**Table S7.** Bader atomic charges in *e* of Mo<sub>6</sub>S<sub>8</sub> cluster for comparison with Mo<sub>3</sub>S<sub>4</sub> nanomaterial.

|                                             | Mo   | S     |
|---------------------------------------------|------|-------|
| Mo <sub>6</sub> S <sub>8</sub> cluster      | 0.79 | -0.59 |
| Mo <sub>3</sub> S <sub>4</sub> nanomaterial | 0.76 | -0.57 |

**Table S8.** Orbital types transformed irreducible representations of d-based AOs in octahedral clusters.

| Orbital type             | Irreducible representation          |
|--------------------------|-------------------------------------|
| $\Gamma d_{xy}$          | $a_{2u} + e_u + t_{2g}$             |
| $\Gamma d_{x^2-y^2}$     | $a_{2g} + e_g + t_{2u}$             |
| $\Gamma d_z^2$           | $a_{1g} + e_g + t_{1u}$             |
| $\Gamma(d_{xz}, d_{yz})$ | $t_{1g} + t_{2g} + t_{1u} + t_{2u}$ |

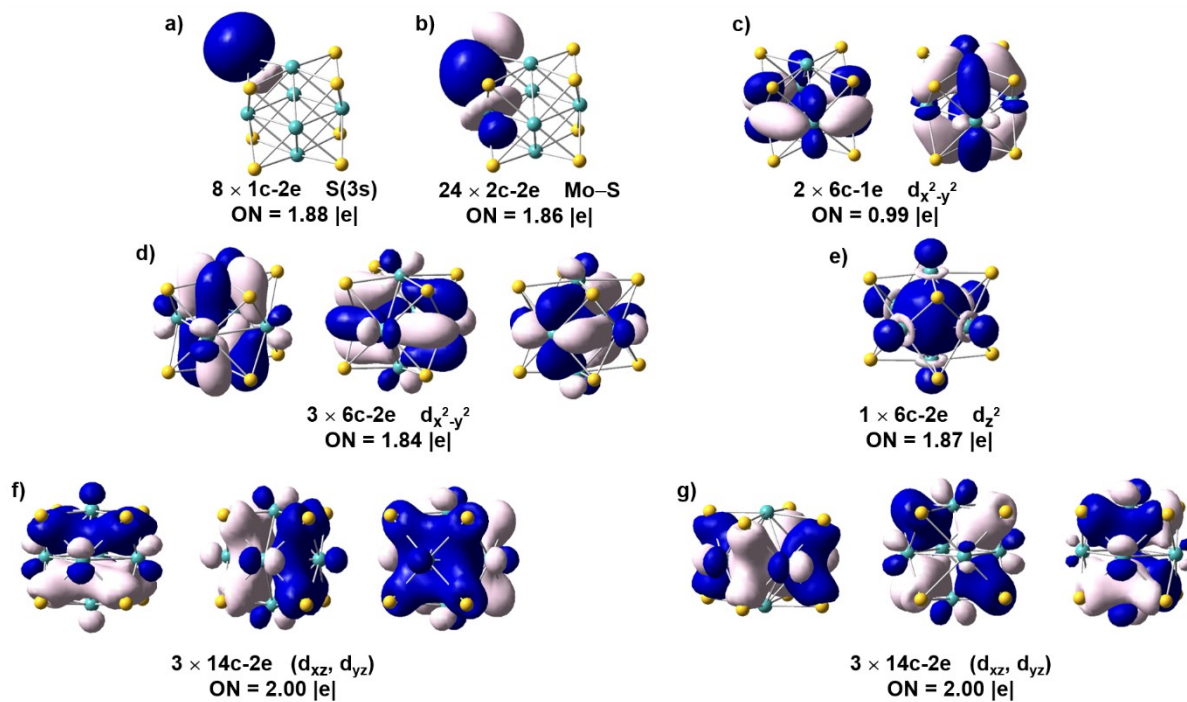

**Figure S7.** Localized orbitals of  $\text{Mo}_6\text{S}_8^{2-}$  revealed by AdNDP methods at the PBE/VTZ level.
